# Supplementary material for: A Multifunctional Metal–Phenolic Nanocoating on Bone Implants for Enhanced Osseointegration via Early Immunomodulation
Source: PubMed Central journal article supplement (PMC11095205; doi:10.1002/advs.202307269), 2024-03-06
Supplement: ADVS-11-2307269-s001.pdf [file ADVS-11-2307269-s001.pdf]

## Supporting Information

for *Adv. Sci.*, DOI 10.1002/adv.202307269

A Multifunctional Metal–Phenolic Nanocoating on Bone Implants for Enhanced Osseointegration via Early Immunomodulation

*Jin Liu, Yilin Shi, Yajun Zhao, Yue Liu, Xiaoru Yang, Kai Li, Weiwei Zhao, Jianmin Han\*, Jianhua Li\* and Shaohua Ge\**

---

## Supporting information

**TABLE S1** Primer sets (Rattus) used for quantitative real-time PCR.

| RNA template | Forward primer (5'-3') | Reverse primer (5'-3') |
|--------------|------------------------|------------------------|
| <i>GAPDH</i> | TCTCTGCTCCTCCCTGTTCT   | ATCCGTTACACCCGACCTTC   |
| <i>ALP</i>   | ACAACACCAACGCTCAGGTC   | GTGACCTCGTTCCCCTGAGT   |
| <i>OCN</i>   | TGACAAAGCCTTCATGTCCAAG | GAAGCCAATGTGGTCCGCTA   |
| <i>Runx2</i> | ACGAATGCACTATCCAGCCA   | GCAGGTACGTGTGGTAGTGA   |

**TABLE S2** Primer sets (Mice) used for quantitative real-time PCR.

| RNA template                  | Forward primer (5'-3') | Reverse primer (5'-3') |
|-------------------------------|------------------------|------------------------|
| <i>GAPDH</i>                  | TGTCTCCTGCGACTTCAACA   | GGTGGTCCAGGGTTTCTTACT  |
| <i>CD11c</i>                  | TCTTCTGCTGTTGGGGTTTGT  | TCAGCACCGTCCATGTGAAA   |
| <i>CD86</i>                   | TCTGCCGTGCCAATTACAA    | TGTGCCCAAATAGTGCTCGT   |
| <i>CD206</i>                  | GCTTCCGTCACCCTGTATGC   | CTGCTCCACAATCCCGAACC   |
| <i>IL-1<math>\beta</math></i> | GTGTCTTTCCCGTGGACCTT   | AATGGGAACGTCACACACCA   |
| <i>IL-10</i>                  | CACTACCAAAGCCACAAGGCA  | GAGCAGGCAGCATAGCAGTG   |
| <i>TGF-<math>\beta</math></i> | GCAACAATTCCTGGCGATACC  | ATTTCCCCTCCACGGCTCAA   |
| <i>OCN</i>                    | TCTGACCTCACAGATGCCAAG  | AGGGTTAAGCTCACACTGCT   |
| <i>ALP</i>                    | GCACCTGCCTTACCAACTCT   | GTGGAGACGCCCATACCATC   |
| <i>Col-1</i>                  | CCCTGGTCCCTCTGGAAATG   | GGACCTTTGCCCCCTTCTTT   |
| <i>Runx2</i>                  | CAGGCAGTTCCCAAGCATT    | GGTAAAGGTGGCTGGGTAGT   |

**TABLE S3** Elemental analysis of different substrates.

| Element | Weight percentage (%) |            |            |            |
|---------|-----------------------|------------|------------|------------|
|         | Ti                    | Ti@TA-Sr-1 | Ti@TA-Sr-4 | Ti@TA-Sr-8 |
| Ti      | 92.94                 | 92.63      | 91.67      | 90.64      |
| O       | 6.19                  | 5.87       | 6.38       | 6.81       |
| C       | 0.88                  | 0.9        | 0.95       | 1.06       |
| Sr      | 0                     | 0.61       | 1.01       | 1.48       |

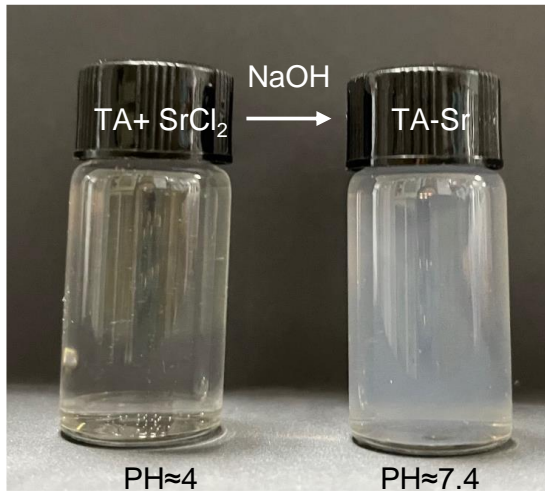

**Figure S1.** Photograph of changes in the reaction solution.

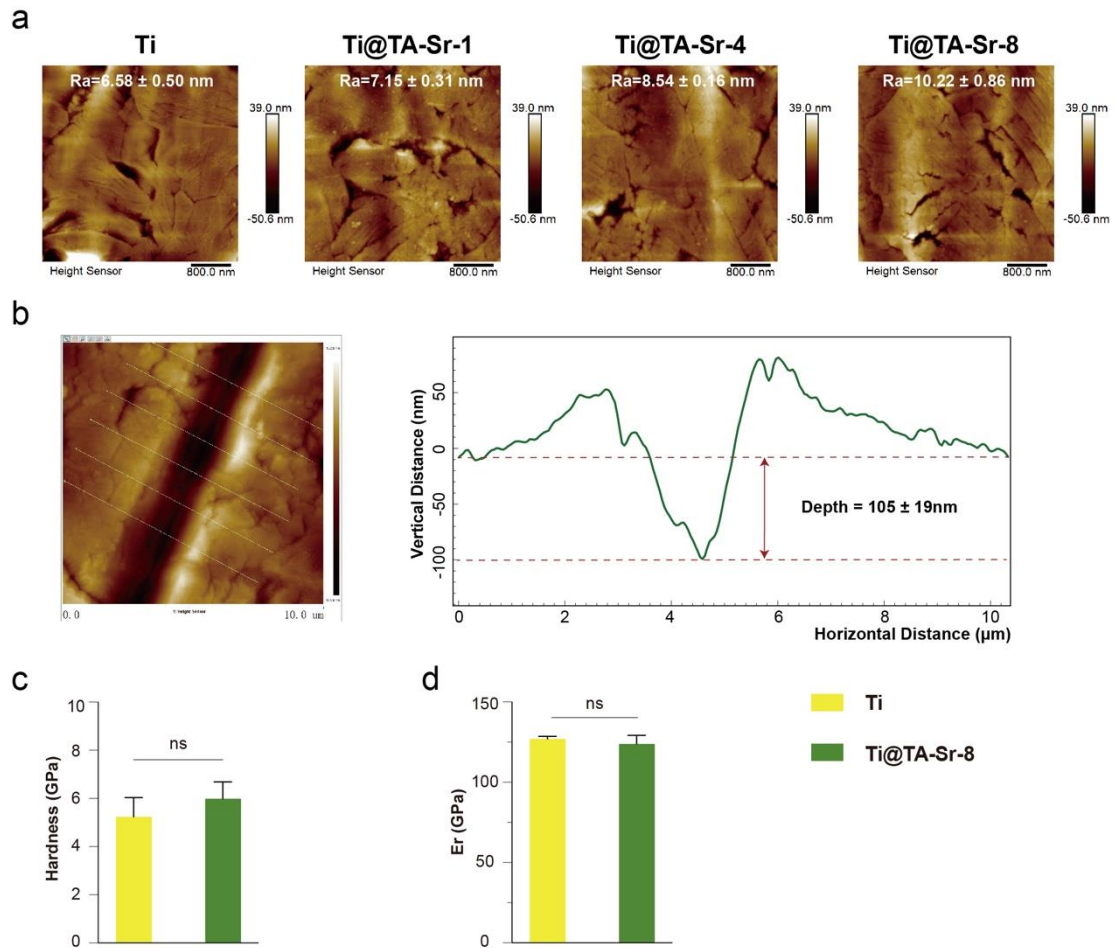

**Figure S2.** (a) Surface morphologies and roughness of the coatings deposited on smooth Ti foils observed by AFM ( $n=3$ ); (b) Thickness of TA-Sr-8 evaluated by scratch test ( $n=6$ ); (c, d) Hardness and reduced modulus ( $E_r$ ) of coated and uncoated Ti substrates ( $n=5$ ), analyzed by two-tailed unpaired Student's  $t$ -test. The error bar represented mean  $\pm$  SD; ns, no significance.

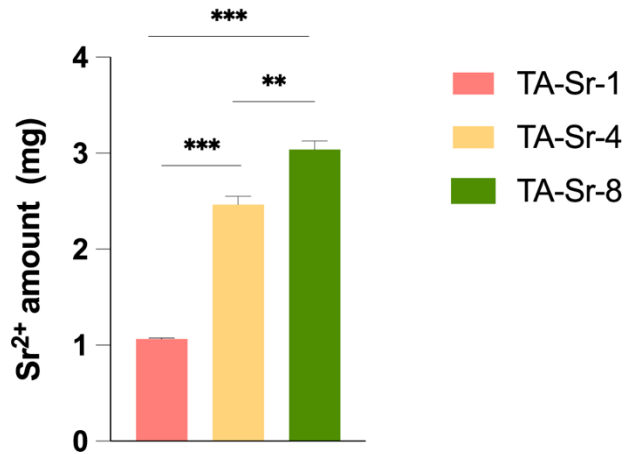

**Figure S3.** Total amount of Sr<sup>2+</sup> detected by ICP-MS (n=3). The data were analyzed by one-way ANOVA test. The error bar represented mean ± SD; \**P* < 0.01 and \*\*\**P* < 0.001.

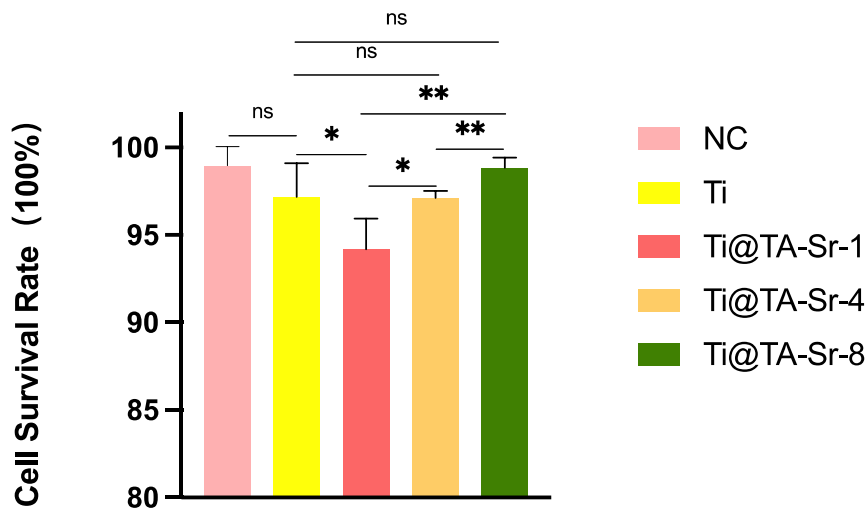

**Figure S4.** Percentages of live cells of BMSCs cultured on coated or uncoated Ti plates (n=5) . The data were analyzed by one-way ANOVA test. The error bar represented mean ± SD; ns, no significance, \**P* < 0.05, \*\**P* < 0.01.

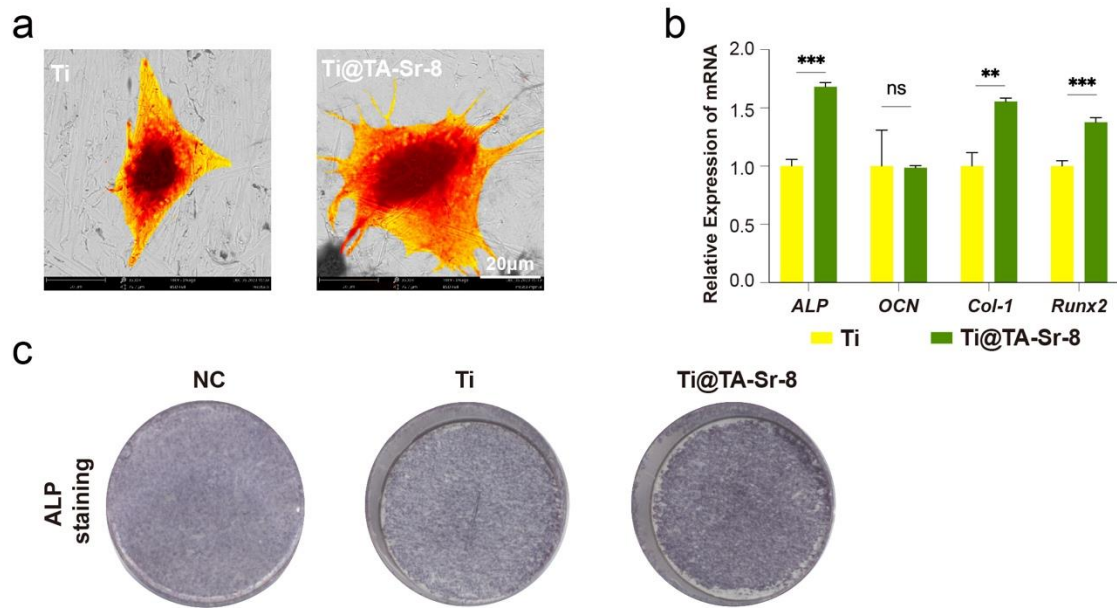

**Figure S5** (a) Morphologies of MC3T3-E1 after 24 h of culture captured by SEM (cells were pseudocolored orange for visual observation); (b) osteogenesis-related genes relative expression of *ALP*, *OCN*, *Col-1*, and *Runx2* detected qRT-PCR analysis (n=3); (c) Representative photographs of ALP staining of MC3T3-E1 in different groups at day 7. The data (b) were analyzed by two-tailed unpaired Student's *t*-test. The error bar represented mean  $\pm$  SD; ns, no significance, \*\* $P < 0.01$  and \*\*\* $P < 0.001$ .

MC3T3-E1 were cultured in  $\alpha$ -MEM medium containing 1% penicillin-streptomycin and 10% FBS at 37°C with a 5% CO<sub>2</sub> humidified atmosphere. The medium was refreshed every 3 days and the cells were dissociated by trypsinization when the density reached 80-90% confluence. After incubating for 24h, the cell morphologies on different samples were observed by SEM (Pro G5, Phenome) after fixation with Gluta fixative (Solarbio), gradual dehydration, lyophilization, and gold sputtering.

MC3T3-E1 cells were seeded on various Ti plates and incubated for 24 h, then the medium was replaced with osteogenic inducing medium consisting of  $\alpha$ -MEM supplemented with 10%FBS, 10<sup>-8</sup> M dexamethasone, 50 mg/L ascorbic acid, and 10 mM  $\beta$ -glycerophosphate, and the medium was updated every 3 days.

Quantitative real-time polymerase chain reaction (qRT-PCR): After 7 days of osteogenic induction, total RNA was extracted and quantitative gene expression analysis of *ALP*, *Col-1*, *OCN* and *Runx2* was carried out by qRT-PCR. The primer sequences for those genes mentioned above and GAPDH were listed in Table S2.

ALP staining: After 7 days of osteogenic induction, samples were rinsed with PBS, fixed with 4% PFA for 10 min, and then stained by a BCIP/NBT Alkaline Phosphatase Color Development Kit (Beyotime) in the dark following the manufacturer's protocol. 5 min later, the chromogenic reaction was terminated by washing with deionized water, and the dyeing results were captured by a scanner (FlieScan 1520, Microtek). ALP

activity was analyzed with an AKP Detection Kit (Nanjing Jiancheng) and a BCA Protein Assay Kit (Solarbio) according to the manufacturer's instructions.

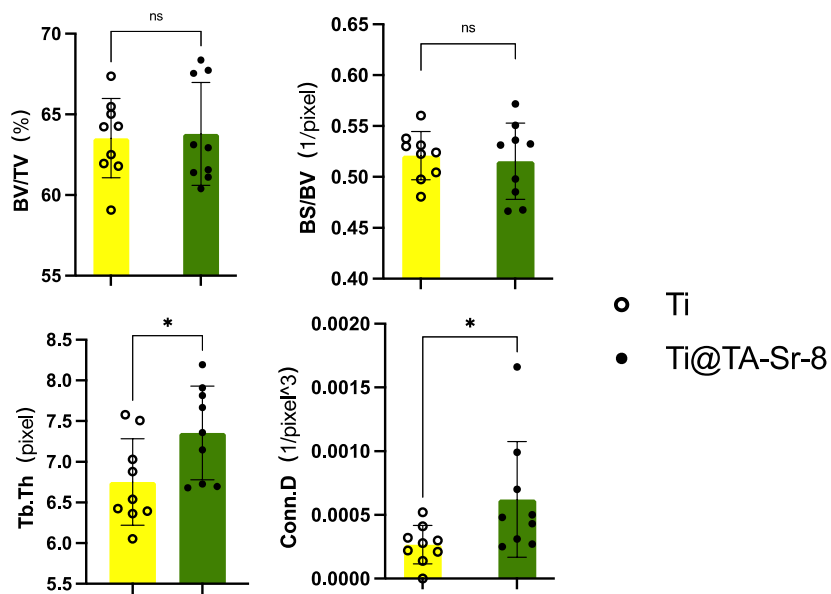

**Figure S6.** Micro-CT analysis of bone regeneration 8 weeks post-implantation (n=9). The data were analyzed by two-tailed unpaired Student's *t*-test. The error bar represented mean ± SD; ns, no significance, \**P* < 0.05.
